# Supplementary material for: Boosting the charge injection of polymer electrets for light-stimulated artificial synaptic transistors
Source: Royal Society of Chemistry journal article supplement (doi:10.1039/d4tc02706j), 2024-01-01
Supplement: d4tc02706j1.pdf [file d4tc02706j1.pdf]

Supporting Information

## **Boosting Charge Injection of Polymer Electrets for Light-stimulated Artificial Synaptic Transistor**

Dongfan Li<sup>1,3</sup>, Runyi Hu<sup>1</sup>, Yufeng Zhu<sup>1</sup>, Yifei Lu<sup>1</sup>, Zhikun Hou<sup>1</sup>, Jiamei Liu<sup>2</sup>, Guanghao Lu<sup>3</sup>, Laju Bu<sup>1\*</sup>

<sup>1</sup>School of Chemistry, Xi'an Jiaotong University, Xi'an, 710049, P. R. China

<sup>2</sup>Instrumental Analysis Center, Xi'an Jiaotong University, Xi'an, 710049, P. R. China

<sup>3</sup>Frontier Institute of Science and Technology and State Key Laboratory of Electrical Insulation and Power Equipment, Xi'an Jiaotong University, Xi'an, 712046, P. R. China

\*Corresponding Authors: Prof. Laju Bu

Email: laju2014@mail.xjtu.edu.cn

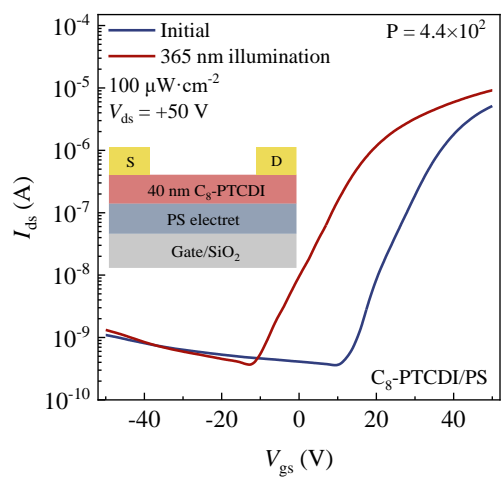

**Fig. S1** The photoconductivity test of  $\text{C}_8\text{-BTBT/C}_8\text{-PTCDI/PS}$  organic field-effect transistors.

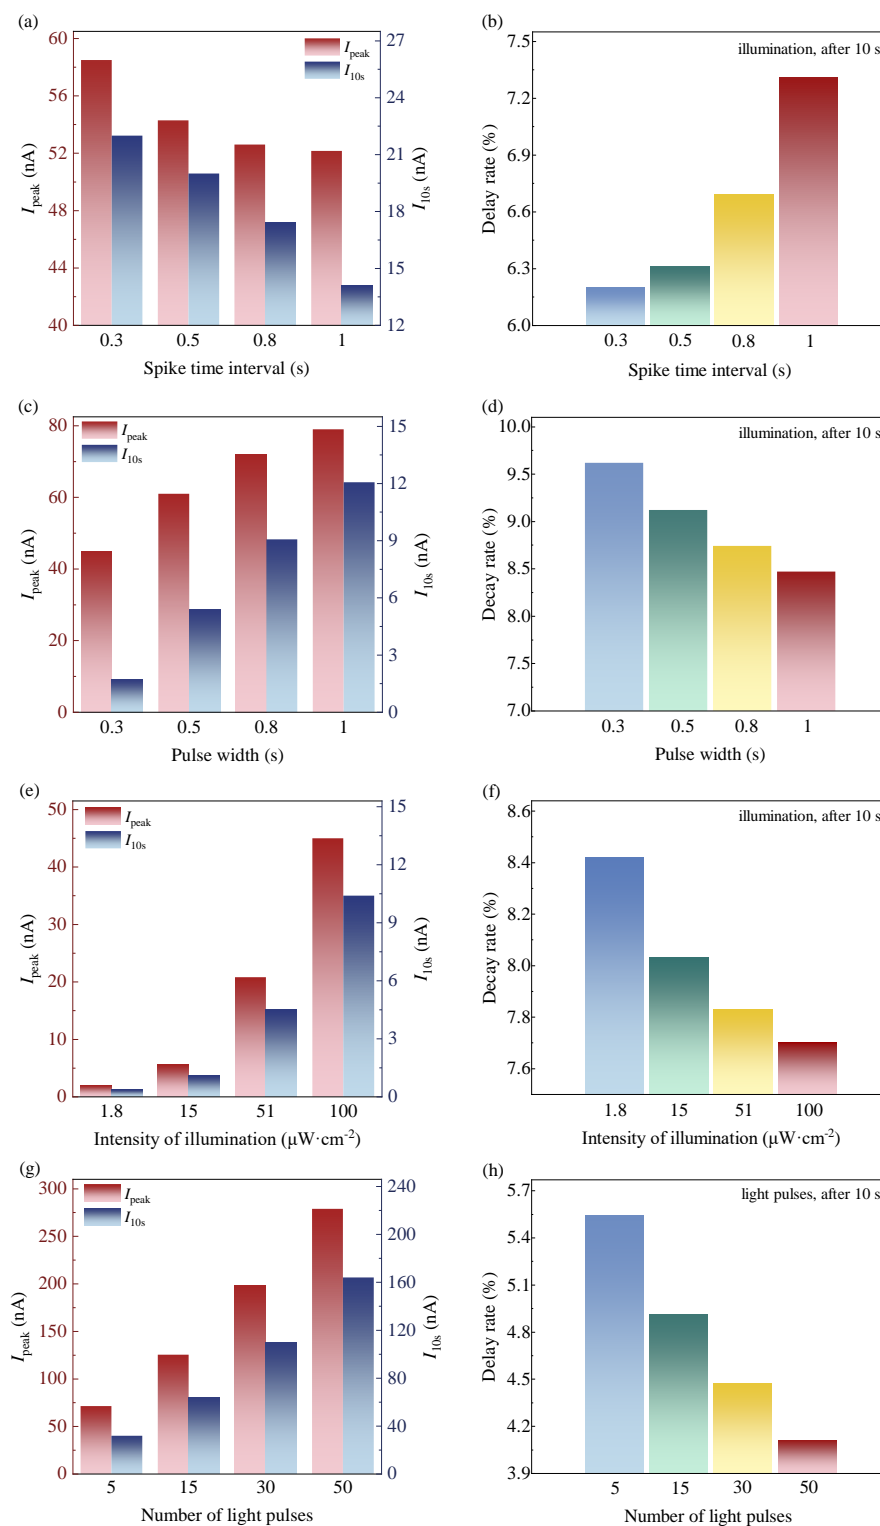

**Fig. S2** The four factors that affect the peak excitatory postsynaptic current values and the values after removing the light source 10 seconds. (a-b) Excitatory postsynaptic current, and decay rate versus the change in time under different spike time interval. Note that decay rate is defined as  $[(I_{peak} - I_{10s}) / (I_{peak} \times 10)] \times 100\%$ . (c-d) Excitatory postsynaptic current increases with increasing pulse width, decay rate decreases with increasing pulse width. (e-f) Excitatory postsynaptic current increases with increasing light intensity, decay rate decreases with increasing light intensity. (g-h) Excitatory postsynaptic current increases with increasing light pulses, decay rate decreases with increasing light pulses.
